# Supplementary material for: Ni nanocatalysts supported on mesoporous Al2O3–CeO2 for CO2 methanation at low temperature
Source: Royal Society of Chemistry journal article supplement (doi:10.1039/c9ra08967e), 2020-01-01
Supplement: c9ra08967e1.pdf [file c9ra08967e1.pdf]

Electronic Supplementary Information

**Ni nanocatalysts supported on mesoporous Al<sub>2</sub>O<sub>3</sub>-CeO<sub>2</sub> for CO<sub>2</sub>  
methanation at low temperature**

*Yushan Wu,<sup>a</sup> Jianghui Lin,<sup>a</sup> Guangyuan Ma,<sup>a</sup> Yanfei Xu,<sup>a</sup> Jianli Zhang,<sup>b</sup> Chanatip Samart,<sup>c</sup> Mingyue Ding<sup>\*a,b,d</sup>*

<sup>a</sup> School of Power and Mechanical Engineering, Hubei International Scientific and Technological Cooperation Base of Sustainable Resource and Energy, Hubei Province Key Laboratory of Accoutrement Technique in Fluid Machinery & Power Engineering, Wuhan University, Wuhan 430072, China

<sup>b</sup> State Key Laboratory of High-efficiency Utilization of Coal and Green Chemical Engineering, Ningxia University, Yinchuan 750021, China

<sup>c</sup> Department of Chemistry, Faculty of Science and Technology, Thammasat University, Rangsit Campus, Klongluang, Pathumtani 12120, Thailand

<sup>d</sup> Shenzhen Research Institute of Wuhan University, Shenzhen 518108, China

**Table S1.** Textural properties of Ni/Al<sub>2</sub>O<sub>3</sub>-CeO<sub>2</sub>-x catalysts.

| sample                                                   | S <sup>a</sup> <sub>BET</sub> (m <sup>2</sup> ·g <sup>-1</sup> ) | V <sup>b</sup> <sub>p</sub> (cm <sup>3</sup> ·g <sup>-1</sup> ) | D <sup>c</sup> <sub>p</sub> (nm) |
|----------------------------------------------------------|------------------------------------------------------------------|-----------------------------------------------------------------|----------------------------------|
| Ni/Al <sub>2</sub> O <sub>3</sub>                        | 291                                                              | 0.35                                                            | 3.30                             |
| Ni/Al <sub>2</sub> O <sub>3</sub> -CeO <sub>2</sub> -10  | 152                                                              | 0.35                                                            | 4.35                             |
| Ni/Al <sub>2</sub> O <sub>3</sub> -CeO <sub>2</sub> -5   | 102                                                              | 0.22                                                            | 3.77                             |
| Ni/Al <sub>2</sub> O <sub>3</sub> -CeO <sub>2</sub> -2.5 | 105                                                              | 0.19                                                            | 3.66                             |
| Ni/Al <sub>2</sub> O <sub>3</sub> -CeO <sub>2</sub> -1   | 95                                                               | 0.19                                                            | 3.72                             |

<sup>a</sup> Calculated by the BET equation.

<sup>b</sup> BJH desorption pore volume.

<sup>c</sup> BJH desorption average pore diameter.

**Table S2.** The calculated peak area ratio of O1s (O<sub>A</sub>/O<sub>T</sub>, %) in Ni/Al<sub>2</sub>O<sub>3</sub>-CeO<sub>2</sub>-x catalysts.

| Catalyst                                | Ni/Al <sub>2</sub> O <sub>3</sub> -CeO <sub>2</sub> -x |       |       |       |
|-----------------------------------------|--------------------------------------------------------|-------|-------|-------|
|                                         | 10                                                     | 5.0   | 2.5   | 1.0   |
| Fresh (O <sub>A</sub> /O <sub>T</sub> ) | 73.06                                                  | 89.67 | 87.65 | 85.98 |
| Spent (O <sub>A</sub> /O <sub>T</sub> ) | 91.35                                                  | 84.08 | 85.73 | 85.26 |

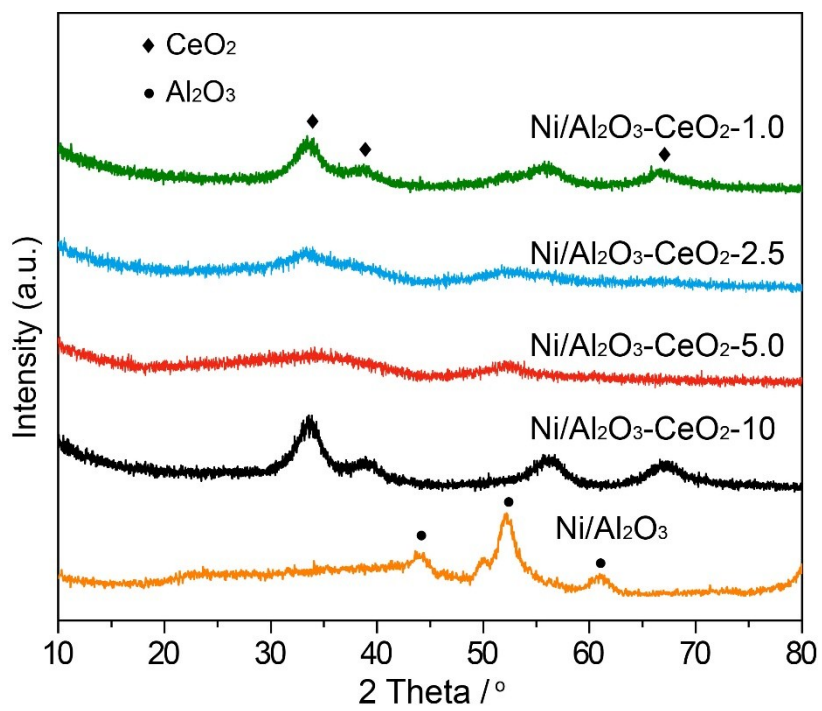

**Fig. S1.** PXRD patterns of the spent Ni/Al<sub>2</sub>O<sub>3</sub>-CeO<sub>2</sub>-x catalysts.
